# Supplementary material for: Manifesto for the routine use of NMR for the liquid product analysis of aqueous CO2reduction: from comprehensive chemical shift data to formaldehyde quantification in water
Source: Royal Society of Chemistry journal article supplement (doi:10.1039/c9dt04749b), 2020-01-01
Supplement: c9dt04749b1.pdf [file c9dt04749b1.pdf]

# **Manifesto for the routine use of NMR for the liquid product analysis of aqueous CO<sub>2</sub> reduction: from comprehensive chemical shift data to formaldehyde quantification in water**

Tamal Chatterjee<sup>‡</sup>, Etienne Boutin<sup>‡</sup> and Marc Robert <sup>\*</sup>

*Université de Paris, Laboratoire d'Electrochimie Moléculaire, CNRS, Paris, France.*

Email: robert@u-paris.fr

## **Supporting Information**

### **Table of content**

S1 – Materials and solvents

S2 - NMR parameters

S3 – Product concentration quantification

S4 - DMSO vs DMSO<sub>2</sub> spectra for HCHO quantification

S5 - HCHO quantification spectra using DMSO<sub>2</sub> as internal standard

S6 - List of possible products (C<sub>1</sub> to C<sub>3</sub>)

## S1 – Material and solvents

Following compounds are purchased from the mentioned suppliers:

**Sigma-Aldrich** : Deuterium oxide ( $D_2O$ ), Dimethyl sulfoxide 99.8% (DMSO), and Dimethyl sulfone NMR standard grade ( $DMSO_2$ ), 3-(Trimethylsilyl)propane-1-sulfonate sodium salt (DSS), Methanol, Formaldehyde (37% in water, stabilized with 15-20% methanol), Sodium bisulfite ACS Reagent, Lactaldehyde, DL-Glyceraldehyde,  $\beta$ -Hydroxypyruvic acid, Sodium mesoxalate monohydrate, Acrolein, Glycerol, Propionic acid, Malonic acid, Propargyl alcohol, Methyl acetate, 2-Hydroxyethyl formate, Potassium formate, Acetaldehyde, Glyoxal 40 wt % in  $H_2O$ , Acetic acid, glyoxylic acid, Glycolic acid, Isopropanol. **Alfa Aesar**: Pyruvic acid, Propan-1-ol, 1,2-Propanediol, 1,3-Propanediol, Pyruvic aldehyde (35-45% w/w aq. Soln), Lactic acid, Hydroxyacetone, Pyruvic acid, Glyceric acid, Dihydroxyacetone, Tartronic acid, Allyl alcohol, Acrylic acid, 2-Methoxyacetic acid, Methyl glycolate, 1,3,5-Trioxane. **TCI Chemical**: 2-Methoxyethanol, Dimethyl Carbonate, Dimethoxymethane, Ethylene glycol, Methyl formate. **ACROS Organics**: Pyruvic acid. **VWR Chemicals**: Acetone. **Merck**: Ethanol.

Materials were used as received. milliQ water (resistance 18.2 ohm at 25°C, pH in between 6 and 7) was employed for all studies.

## S2 - NMR parameters

All measures were operated with a Bruker UltraShield 400 spectrometer (Magnet System 400 MHz, 54 mm UltraShield Long Hold Time) at room temperature. A water pre-saturation method adjusted to the intensity of water signal, considering 10%  $D_2O$  and 90%  $H_2O$  proportion was applied. Shimming of the samples were performed using automatic shim program installed in the ICON-NMR software (Version 5.0.5). After which a 90° width pulse was applied and followed by FID acquisition. Spectral width (SW) was 20.02 ppm large (8012 Hz), with 64 kpt for  $^1H$  and 240 ppm large (24 038 Hz), with 64 kpt for  $^{13}C$ .

### - peak position determination

For  $^1H$  NMR of each compound, 1.5  $\mu L$  (if liquid) or 1.5 mg (if solid) is introduced in 2 mL of milliQ water (except when containing acid functional groups, see below). The NMR tube is prepared right after by mixing:

-48  $\mu L$  of  $D_2O$  (10% volume)

-20  $\mu L$  of internal reference solution (4 mM DMSO or 20 mM DSS).

-412  $\mu L$  of investigated solution

Routine  $^1H$  NMR measurement is then performed with pre-saturation method,  $d1 = 2$  s and 32 scans.

For  $^1H$  NMR chemical shifts, data have been recorded with DMSO as a reference, which position was set to 2.71 ppm. For some of them, signal record was repeated with 3-

(Trimethylsilyl)propane-1-sulfonate sodium salt (DSS) set as 0.00 ppm, giving consistent position  $\pm 0.01$  ppm.

For  $^{13}\text{C}$  NMR chemical shifts, 40  $\mu\text{L}$  (if liquid) or 40 mg (if solid) is introduced in 2 mL of milliQ water (except when containing acid functional groups, see below). The NMR tube is prepared right after by mixing:

- 48  $\mu\text{L}$  of  $\text{D}_2\text{O}$  (10% volume)

- 40  $\mu\text{L}$  of DMSO as internal reference.

- 392  $\mu\text{L}$  of investigated solution

After that, normal  $^{13}\text{C}$  NMR measurement were performed with  $d1 = 2$  s and 64 scans. Data have been recorded with DMSO as a reference, which position was set to 39.39 ppm. Data from the literature have been obtained either with TMS reference positioned at 0.00 ppm or methanol reference set at 49.50 ppm. When chemical shift values are reproduced from the ascribed references, precision of the values can vary from the above mentioned  $\pm 0.01$  ppm.

**IMPORTANT:** In the specific case of compounds containing acidic functional groups, the fully protonated form is recorded in 0.2 M HCl solution while the fully deprotonated is recorded in 0.1 M basic phosphate buffer (pH 12) with the exception of glycerate calcium that was dissolved in 0.1M KOH due to the precipitation of calcium phosphate. All other signal acquisitions have been made in milli-Q so that pH ranges between 6 to 7. For the chemical shift values taken from the literature, pH values are often varied from our experimental conditions but the values have been taken in the range predominant of chemical species of interest. Exact pH values can be found in the corresponding references.

In some particular cases in table 1, we report two  $J_{\text{C-H}}$  values as they appear in  $^1\text{H}$  NMR spectra.

#### **- Quantification measurement (except formaldehyde)**

NMR tubes are prepared by introducing:

- 48  $\mu\text{L}$  of  $\text{D}_2\text{O}$  (10% volume),

- 40  $\mu\text{L}$  of 4 mM internal reference solution (DMSO),

- 392  $\mu\text{L}$  of investigated solution.

Routine  $^1\text{H}$  NMR measurement is then performed with pre-saturation method,  $d1 = 25$  s and 128 scans.

#### **Case of formaldehyde quantification**

In this specific case, a slightly modified procedure was used. First, a solution of known concentration of  $\text{HCHO}$  is prepared (from 37% in water solution stabilized with 10-15%  $\text{MeOH}$ ) and rigorously mixed with a fresh 1 M sodium bisulfite solution (50:50, v/v). Then the tube was prepared by introducing:

- 48  $\mu\text{L}$  of  $\text{D}_2\text{O}$  (10% volume),

-20 µL of 4 mM internal reference solution. Dimethylsulfone (DMSO<sub>2</sub>) was selected since DMSO reacts with NaHSO<sub>3</sub> (see below).

-412 µL of prepared mixture solution.

Routine <sup>1</sup>H NMR measurement was then performed using pre-saturation method, d1 = 25 s and 16 scans. At lower concentration (50 µM HCHO case) more scans (128) and 40 µL of 20 mM DMSO<sub>2</sub> were instead used (Fig S2).

Because bisulfite is also known to react with carbon dioxide,<sup>1</sup> solution after electrolysis should be first bubbled with an inert gas such as Argon after electrolysis and fresh bisulfite should be used for each measurement since it is not stable for a long time.

1 M NaHSO<sub>3</sub> solution was used so that its pH predominates over the pH of the analyzed solution, as long as the latter is buffered to 0.1 M or below. In case of higher buffer concentration, a pH check is necessary before performing NMR measurement since the adduct formation is complete only when pH is in the range of predominance of HSO<sub>3</sub><sup>-</sup> anion (3.5 < pH < 5.5). Then its value should be adjusted if necessary. Note also that in the specific case of a NaHCO<sub>3</sub> solution brought to basic pH, if too basic, carbonate can react with hydroxymethane sulfonate (adduct A, see main text), according to the following reaction.<sup>2</sup>

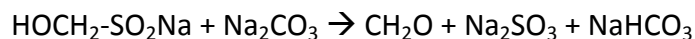

### S3 – Product concentration quantification

On NMR spectrum, phase is corrected so that baseline lies flat around both internal standard and peak of interest. A straight baseline is then applied so that integration is nil at both extremities of the integral.

Concentration in the tube is then calculated from classical equation:

$$C_{\text{product of interest, tube}} = C_{\text{internal standard, tube}} \frac{\frac{I_{\text{product of interest}}}{H_{\text{product of interest}}}}{\frac{I_{\text{internal standard}}}{H_{\text{internal standard}}}}$$

C: concentration

I: Intensity of the peak

H: Protons per molecule attributed to the peak

From concentration in the tube, concentration in the electrolyte is obtain through simple cross-multiplication and then multiply by the volume of electrolyte to get the total production of the compound.

### S4 - DMSO and DMSO<sub>2</sub> stability in presence of bisulfite

Both DMSO and DMSO<sub>2</sub> have been introduced in an NMR tube in presence of 0.05 M NaHSO<sub>3</sub> and methanol as internal standard since this alcohol is known to be stable in presence of bisulfite.<sup>1</sup> In these conditions, DMSO peak is modified after 24h (Fig. S1 a and b) while another peak has appeared at around 2.09 ppm. When same experiment is performed with DMSO<sub>2</sub>, the peak intensity is highly steady even after 48h (Fig. S1 c and d).

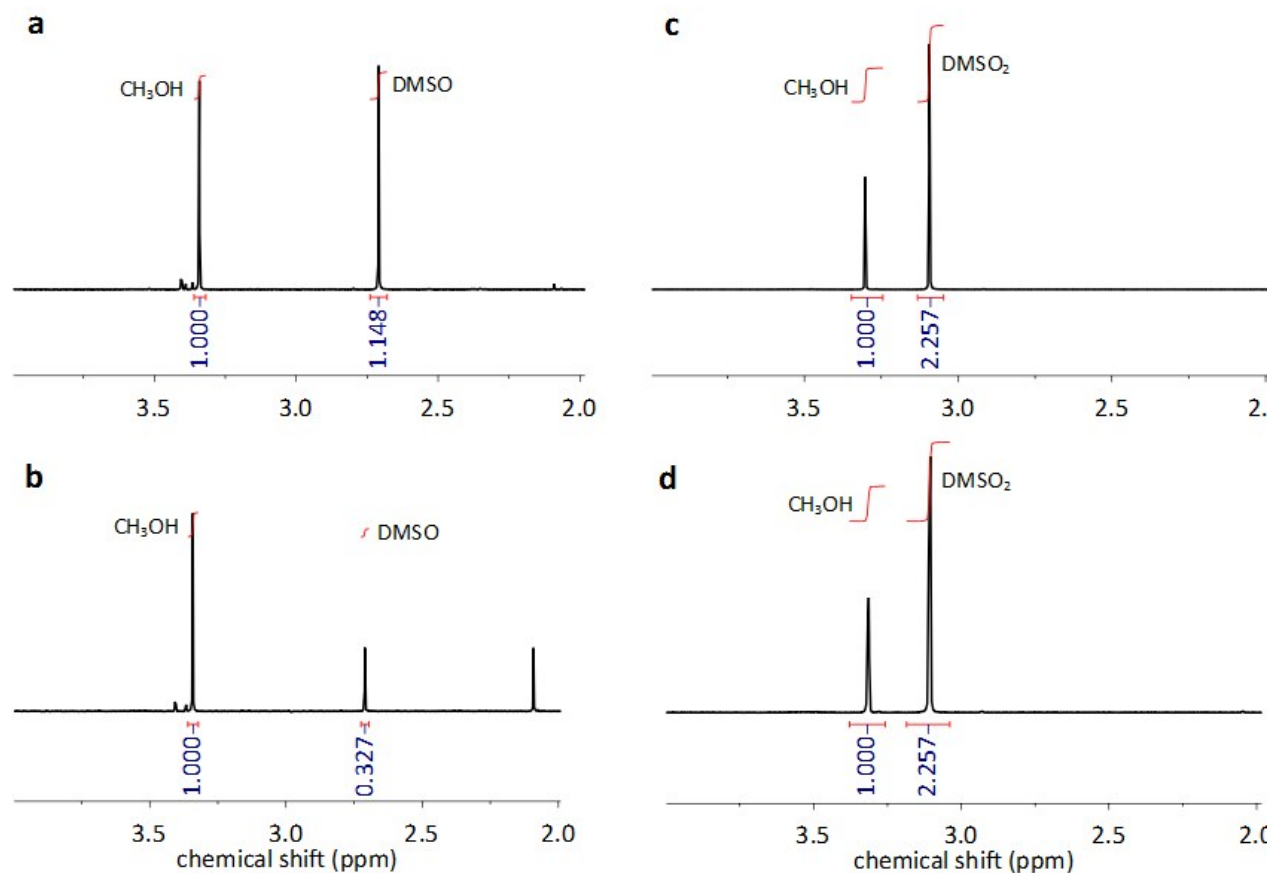

**Fig. S1** Peak intensity of DMSO vs. CH<sub>3</sub>OH reference (a and b) in presence of 0.05 M NaHSO<sub>3</sub> right after filling the tube (a) and after 24h (b). Same experiment with DMSO<sub>2</sub> (c and d) versus CH<sub>3</sub>OH reference in presence of 0.05 M NaHSO<sub>3</sub>, right after filling the tube (c) and after 48h (d).

S5 - HCHO quantification spectra using DMSO<sub>2</sub> as internal standard

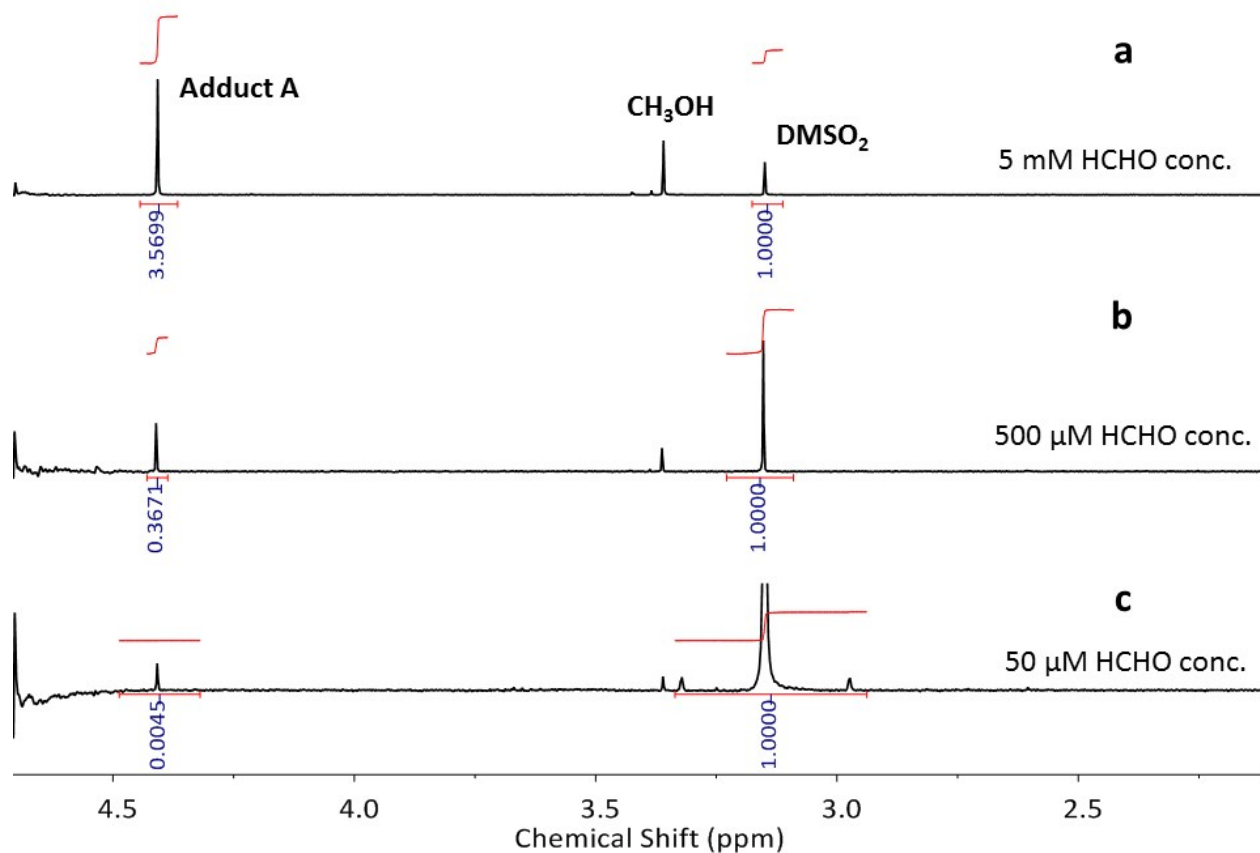

**Fig. S2** Peak intensity of Adduct A vs. DMSO<sub>2</sub> reference after addition step, for three starting concentrations of HCHO. (a) 5 mM, (b) 500 μM and (c) 50 μM.

## S6 - List of possible CO<sub>2</sub>RR products

The following compounds are representing possible products of the type C<sub>x</sub>O<sub>y</sub>H<sub>z</sub>, with x being 1, 2 or 3. Depending on the possibility or not to record <sup>1</sup>H NMR of these products, different colors are assigned. Recorded (green), not recorded but reported from bibliography (blue), no proton recorder due to absence of visible proton in water but <sup>13</sup>C NMR value reported (red), not recorded because gaseous (gray), not recorded because unstable or not available commercially (orange). For acids compounds we also recorded NMR spectra for the corresponding conjugate base. In most cases the <sup>1</sup>H NMR data has been recorder while <sup>13</sup>C value has been taken from literature. In such case, the reference is only given in the <sup>13</sup>C column. When data for both <sup>1</sup>H NMR and <sup>13</sup>C NMR has been taken from literature, reference is given for the full line, next the molecule name.

### Possible C<sub>1</sub> products

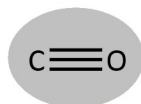

carbon monoxide

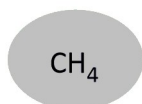

methane

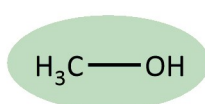

methanol

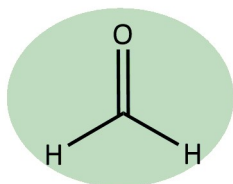

formaldehyde

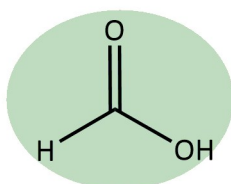

formic acid

## Possible C<sub>2</sub> products

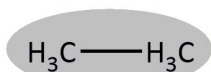

ethane

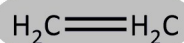

ethene

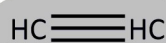

ethyne

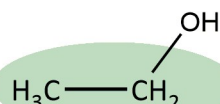

ethanol

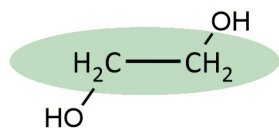

ethane-1,2-diol  
or  
ethylene glycol

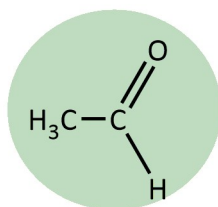

acetaldehyde

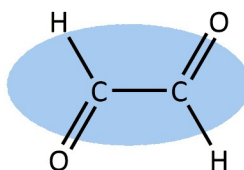

oxalaldehyde  
or  
glyoxal

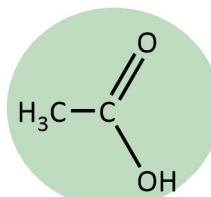

acetic acid

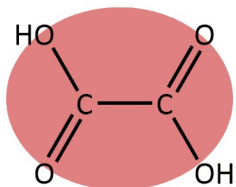

oxalic acid

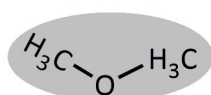

dimethyl ether

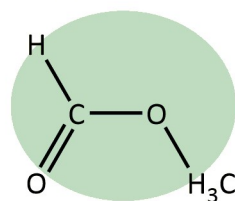

methyl formate

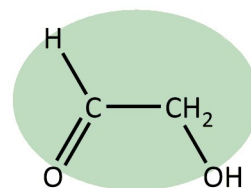

2-hydroxyacetaldehyde  
or  
glycolaldehyde

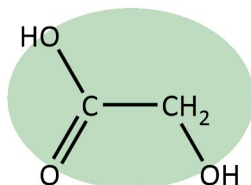

2-hydroxyacetic acid  
or  
glycolic acid

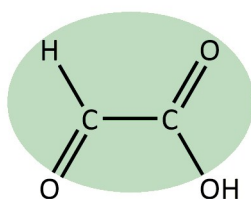

2-oxoacetic acid  
or glyoxylic acid

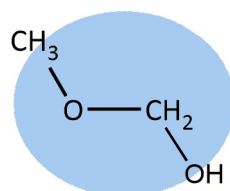

methoxymethanol

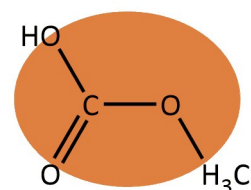

methyl hydrogen  
carbonate



## Possible C<sub>3</sub> products

### Alkane

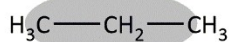

propane

### Alkene

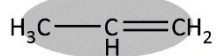

prop-1-ene

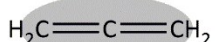

propa-1,2-diene

### Alkyne

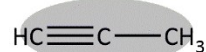

prop-1-yne

### Alcohol

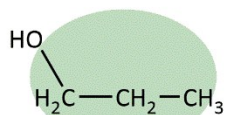

propan-1-ol

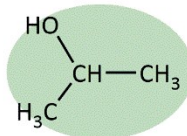

propan-2-ol  
or  
isopropanol

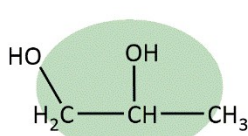

propane-1,2-diol  
or  
propylene glycol

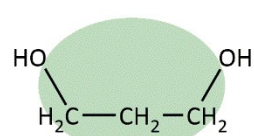

propane-1,3-diol

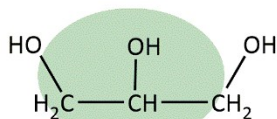

propane-1,2,3-triol  
or glycerol

### Ether

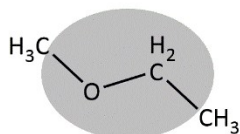

methoxyethane

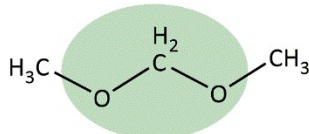

dimethoxymethane

### Carbonyl

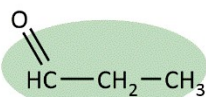

propionaldehyde

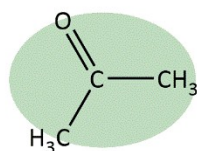

propan-2-one  
or  
acetone

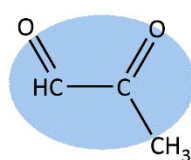

2-oxopropanal  
or methylglyoxal

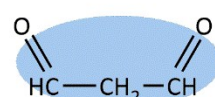

malonaldehyde

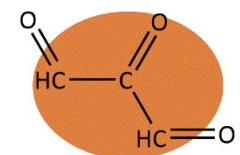

2-oxomalonaldehyde

### Acid

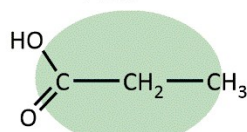

propionic acid

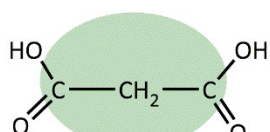

malonic acid

## Combinations

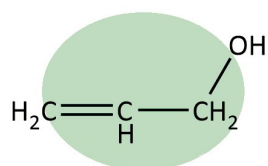

prop-2-en-1-ol  
or  
Allyl alcohol

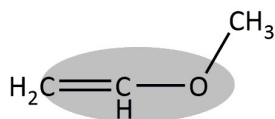

methoxyethene

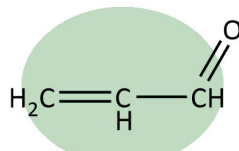

acrylaldehyde  
or  
Acrolein

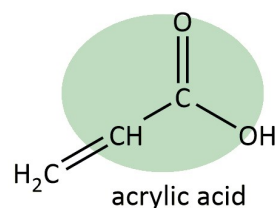

acrylic acid

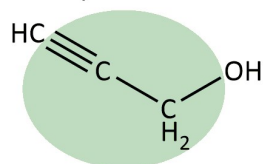

prop-2-yn-1-ol  
or  
Propargyl alcohol

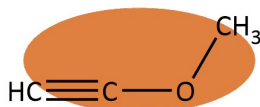

methoxyethyne

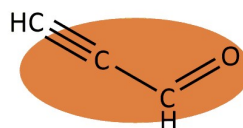

propiolaldehyde

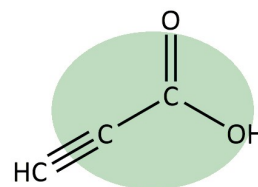

propiolic acid

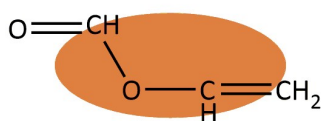

vinyl formate

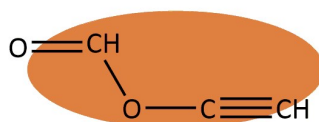

ethynyl formate

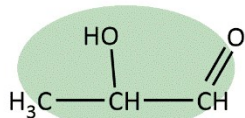

2-hydroxypropanal  
or  
Lactaldehyde

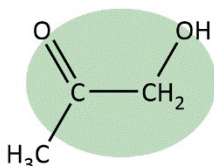

1-hydroxypropan-2-one  
or  
Hydroxyacetone

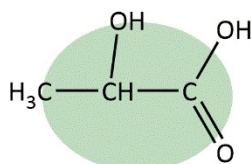

2-hydroxypropanoic acid  
or Lactic acid

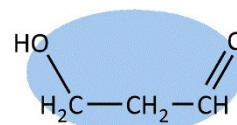

3-hydroxypropanal  
or Reuterin

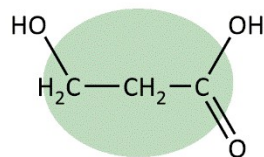

3-hydroxypropanoic acid

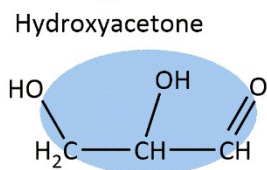

2,3-dihydroxypropanal  
or Glyceraldehyde

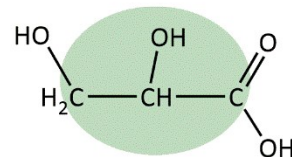

2,3-dihydroxypropanoic acid  
or Glyceric acid

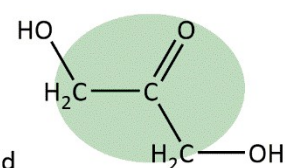

1,3-dihydroxypropan-2-one  
Or dihydroxyacetone

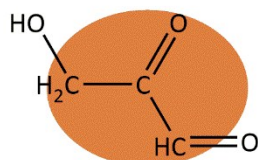

3-hydroxy-2-oxopropanal

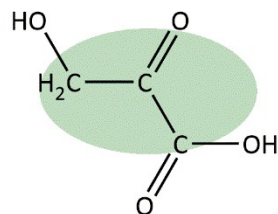

3-hydroxy-2-oxopropanoic acid  
Or Beta-hydroxypyruvic acid

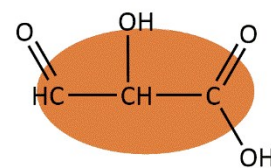

2-hydroxy-3-oxopropanoic acid  
Or tartronate semialdehyde

## Combination (continued)

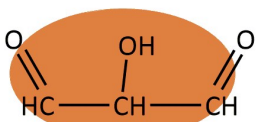

2-hydroxymalonaldehyde  
Or glucic acid

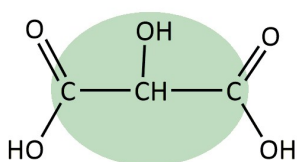

2-hydroxymalonic acid  
Or tartronic acid

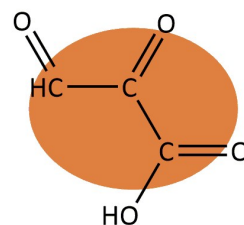

2,3-dioxopropanoic acid

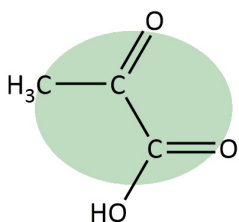

2-oxopropanoic acid  
or  
pyruvic acid

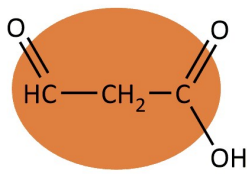

3-oxopropanoic acid

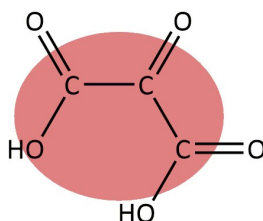

2-oxomalonic acid  
or mesoxalic acid

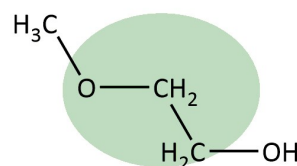

2-methoxyethanol

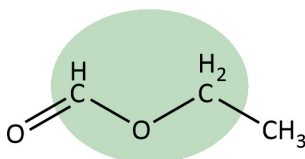

ethyl formate

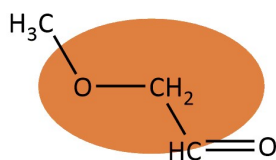

2-methoxyacetaldehyde

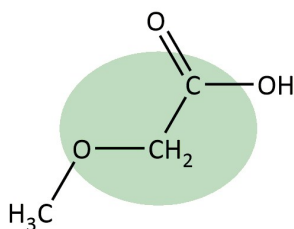

2-methoxyacetic acid

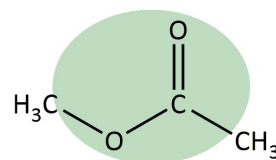

methyl acetate

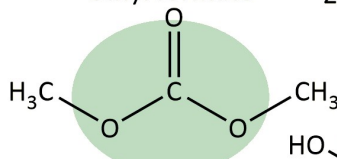

dimethyl carbonate

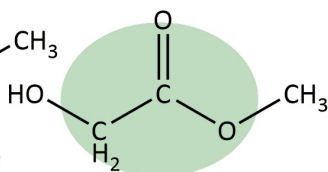

methyl 2-hydroxyacetate  
or  
Methyl glycolate

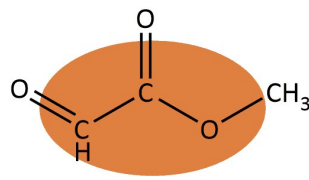

methyl 2-oxoacetate

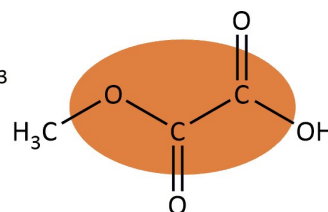

2-methoxy-2-oxoacetic acid

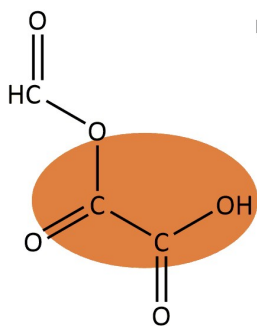

2-(formyloxy)-2-oxoacetic acid

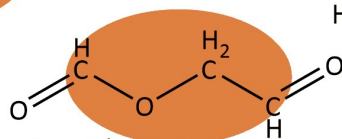

2-oxoethyl formate

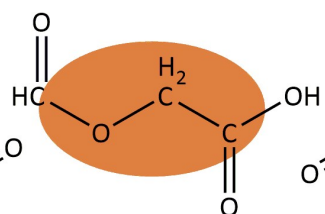

2-(formyloxy)acetic acid

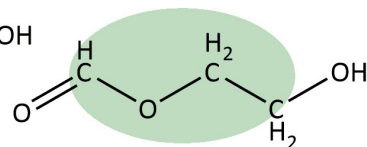

2-hydroxyethyl formate

## Combination (continued)

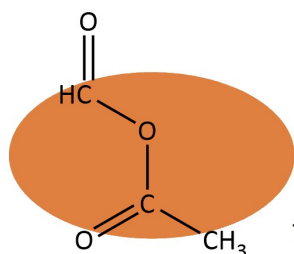

acetic formic anhydride

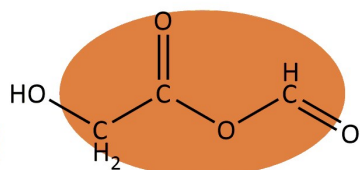

formic 2-hydroxyacetic anhydride

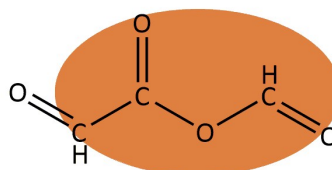

formic 2-oxoacetic anhydride

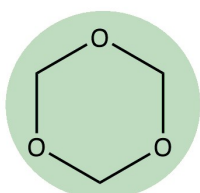

1,3,5-trioxane

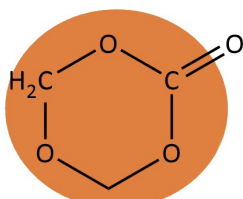

1,3,5-trioxan-2-one

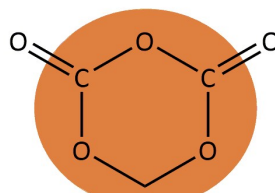

1,3,5-trioxane-2,4-dione

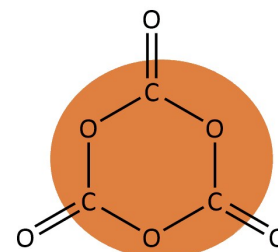

1,3,5-trioxane-2,4,6-trione

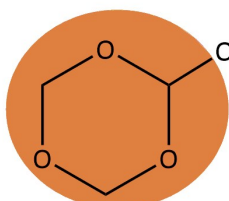

1,3,5-trioxan-2-ol

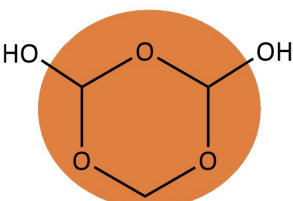

1,3,5-trioxane-2,4-diol

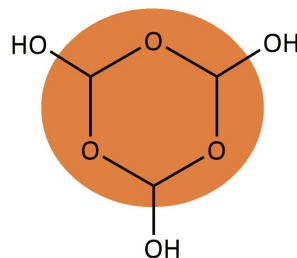

1,3,5-trioxane-2,4,6-triol

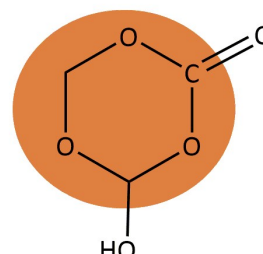

4-hydroxy-1,3,5-trioxan-2-one

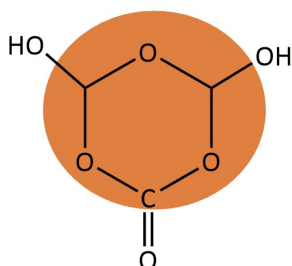

4,6-dihydroxy-1,3,5-trioxan-2-one

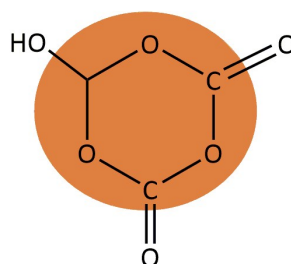

6-hydroxy-1,3,5-trioxane-2,4-dione

## SI References

1. J. F. Walker, in *Formaldehyde - Monograph series no. 159*, 1964, pp. 483-510.
2. A. Gardziella, L. A. Pilato and A. Knop, 2000, p. 502.
